# Supplementary material for: Physical and Chemical Activation of Graphene-Derived Porous Nanomaterials for Post-Combustion Carbon Dioxide Capture
Source: MDPI journal article supplement (doi:10.3390/nano11092419), 2021-09-17

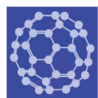

## Supplementary Materials

## Physical and Chemical Activation of Graphene-Derived Porous Nanomaterials for Post-Combustion Carbon Dioxide Capture

Rabita Mohd Firdaus <sup>1,2</sup>, Alexandre Desforges <sup>2</sup>, Mélanie Emo <sup>2</sup>, Abdul Rahman Mohamed <sup>1,\*</sup> and Brigitte Vigolo <sup>2,\*</sup>

<sup>1</sup> School of Chemical Engineering, Engineering Campus, Universiti Sains Malaysia, Nibong Tebal 14300, Malaysia; rabitafirdaus58@student.usm.my

<sup>2</sup> Université de Lorraine, CNRS, IJL, F-54000 Nancy, France; Alexandre.Desforges@univ-lorraine.fr (A.D.); Melanie.Emo@univ-lorraine.fr (M.E.)

\* Correspondence: chrahman@usm.my (A.R.M.); Brigitte.Vigolo@univ-lorraine.fr (B.V.); Tel.: +604-599-6410 (A.R.M.); Tel.: +33-372-742594 (B.V.)

## 1. Interspending Distance of GO from TEM

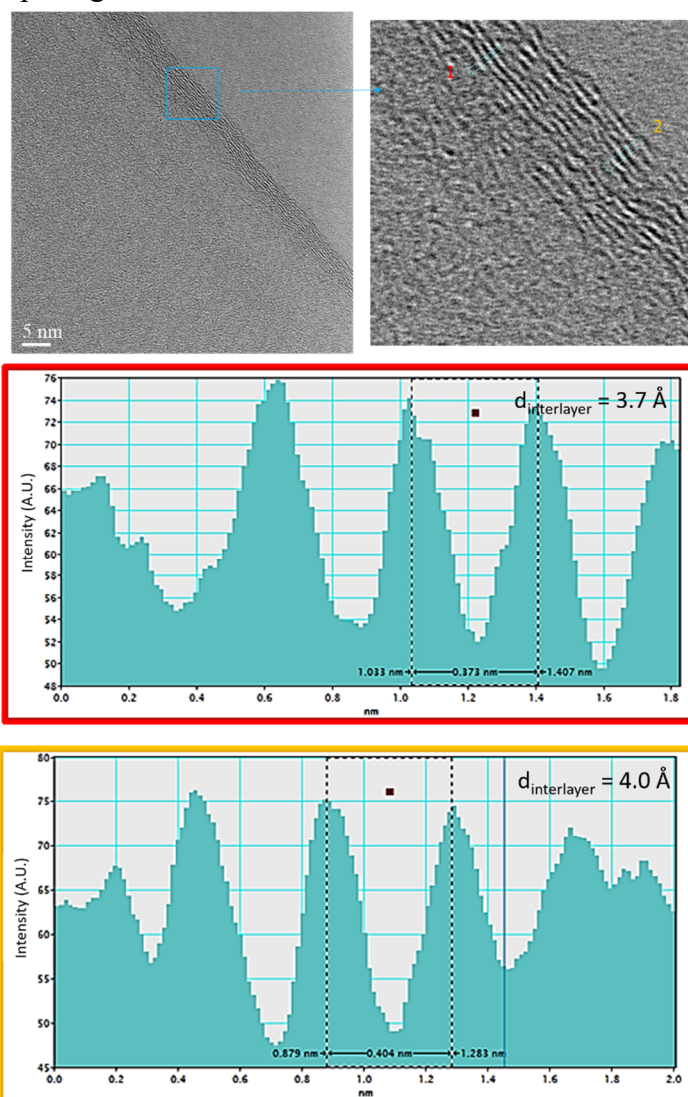

Figure S1. Measurement of interspending layer of GO from TEM.

## 2. XPS Survey Scans of GO, GO-PA 900 and GO-CA 800

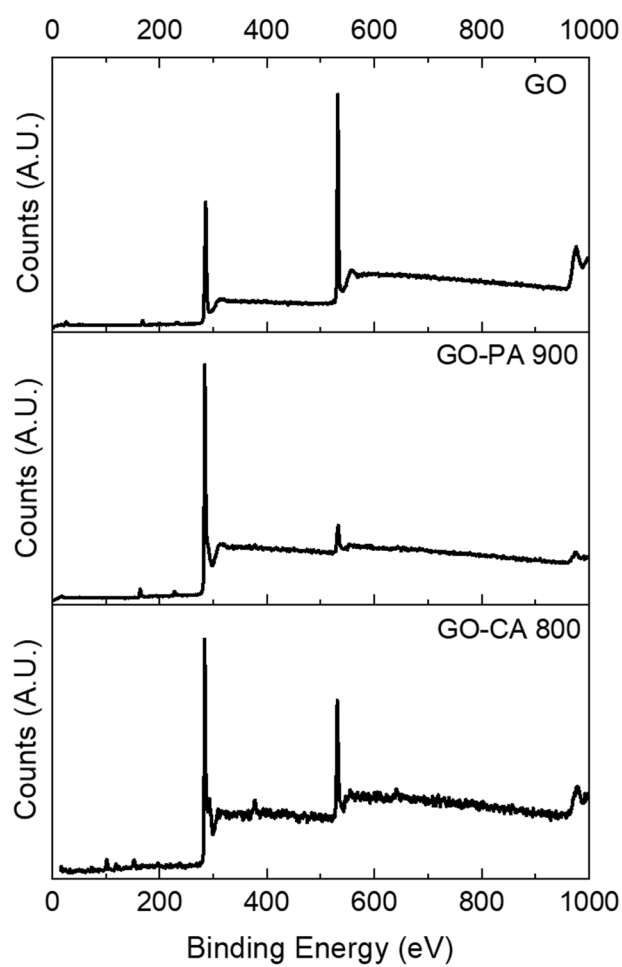

**Figure S2.** Wide range XPS spectra of GO, GO-PA 900 and GO-CA 800.

### 3. XPS O1s Region of GO, GO-PA 900 and GO-CA 800 and Fitting Parameters.

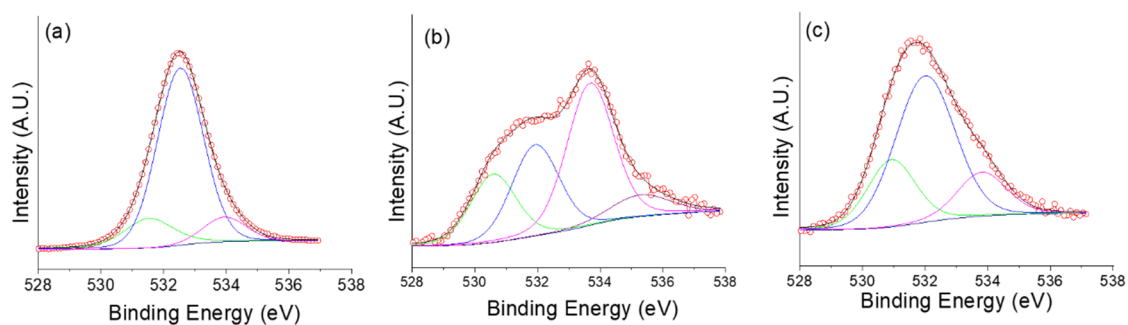

**Figure S3.** XPS O1s region of (a) GO, (b) GO-PA 900 and (c) GO-CA 800.

**Table S1.** Fitting parameters and concentration of the O1s signal of GO.

|                   | O=C-N  | O-C    | O=C-N  |
|-------------------|--------|--------|--------|
| Position (eV)     | 531.52 | 532.53 | 533.94 |
| FWHM              | 1.86   | 1.72   | 1.61   |
| Concentration (%) | 10.79  | 79.64  | 9.57   |

**Table S2.** Fitting parameters and concentration of the O1s signal of GO-PA 900.

|                   | O=C    | O-C    | O3S    | O-C=O  |
|-------------------|--------|--------|--------|--------|
| Position (eV)     | 530.59 | 531.93 | 533.68 | 535.29 |
| FWHM              | 1.72   | 1.77   | 1.76   | 2.26   |
| Concentration (%) | 20.49  | 27.99  | 43.07  | 8.45   |

**Table S3.** Fitting parameters and concentration of the O1s signal of GO-CA 800.

|                   | O=C    | O-C   | O-C=O  |
|-------------------|--------|-------|--------|
| Position (eV)     | 530.92 | 532   | 533.81 |
| FWHM              | 1.80   | 2.23  | 1.86   |
| Concentration (%) | 23.90  | 60.89 | 15.21  |

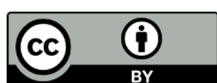

Supplement: s1 [file s1]
